# Supplementary material for: Long-Term Effects of Dietary Olive Oil and Hydrogenated Vegetable Oil on Expression of Lipogenic Genes in Subcutaneous Adipose Tissue of Dairy Cows
Source: PubMed Central journal article supplement (PMC6789855; doi:10.3390/vetsci6030074), 2019-09-15
Supplement: vetsci-06-00074-s001.pdf [file vetsci-06-00074-s001.pdf]

Supplementary Materials

# Long-Term Effects of Dietary Olive Oil and Hydrogenated Vegetable Oil on Expression of Lipogenic Genes in Subcutaneous Adipose Tissue of Dairy Cows

Einar Vargas-Bello-Pérez, Massimo Bionaz, Pietro Sciarresi-Arechabala, Nathaly Cancino-Padilla, María Sol Morales, Jaime Romero, Heidi Leskinen, Philip C. Garnsworthy and Juan J. Llor

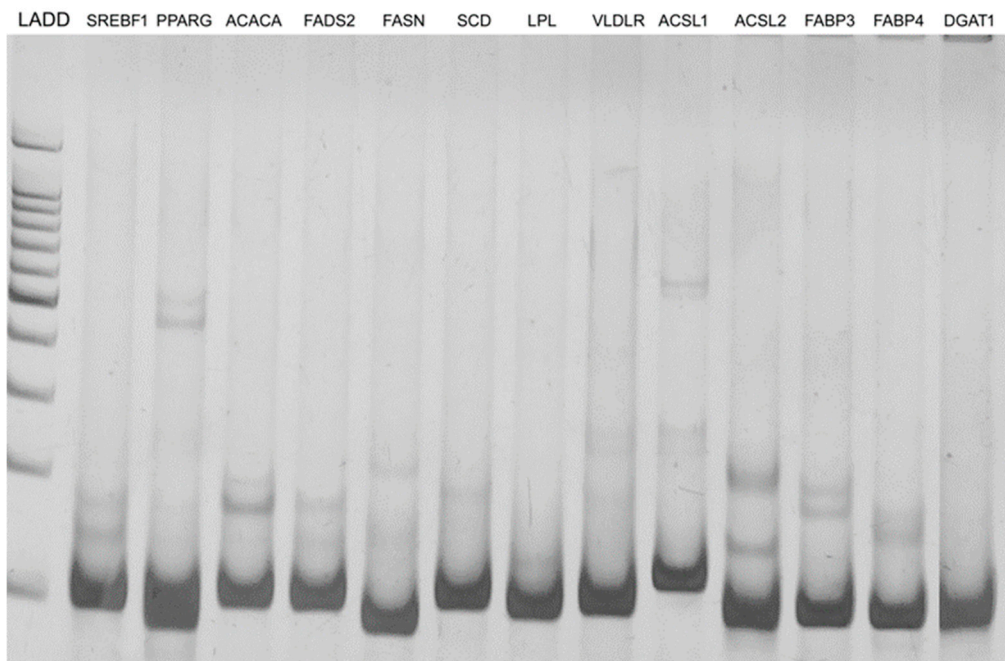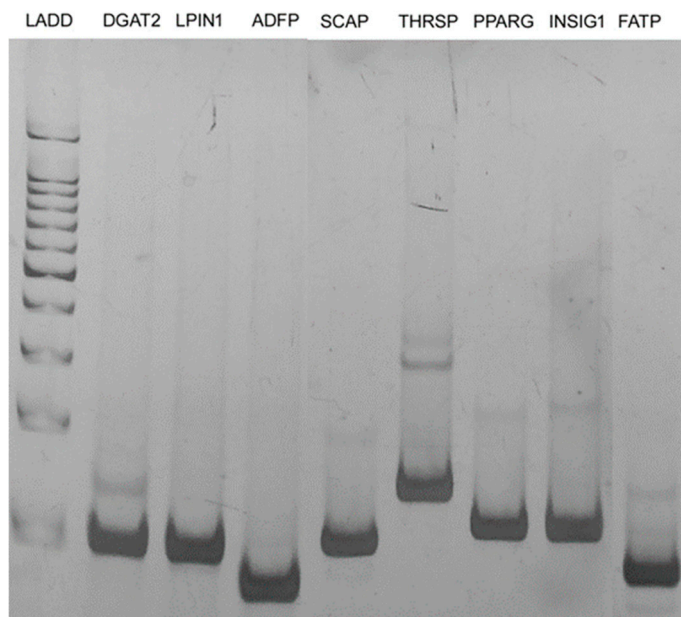

Figure S1. RNA integrity assessment using 1% agarose electrophoresis.

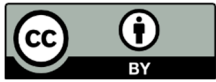

© 2019 by the authors. Licensee MDPI, Basel, Switzerland. This article is an open access article distributed under the terms and conditions of the Creative Commons Attribution (CC BY) license (<http://creativecommons.org/licenses/by/4.0/>).
